# Supplementary material for: Potential Environmental and Health Implications from the Scaled-Up Production and Disposal of Nanomaterials Used in Biosensors
Source: MDPI journal article supplement (doi:10.3390/bios12121082), 2022-11-25
Supplement: s1 [file s1]

**Supplementary Materials:** The following supporting information can be downloaded at: [www.mdpi.com/xxx/s1](http://www.mdpi.com/xxx/s1),

**Table S1.** List of commonly used nanomaterials in biosensors development. Each nanoparticle category is associated with a non-comprehensive set of biosensing applications, as well as their reported properties for enhanced device performance, and detection modes.

| Nanomaterial     | Biosensing Applications                                                                                                                                      | Reported properties                                                                                                   | Operation Modes /References                  |
|------------------|--------------------------------------------------------------------------------------------------------------------------------------------------------------|-----------------------------------------------------------------------------------------------------------------------|----------------------------------------------|
| <b>Nanometal</b> |                                                                                                                                                              |                                                                                                                       |                                              |
| Copper           | Detection of biological molecules, viruses, pathogens                                                                                                        | Low cost and affordable                                                                                               | Fluorescence: [282,283]                      |
|                  |                                                                                                                                                              | Ease of preparation                                                                                                   |                                              |
|                  |                                                                                                                                                              | Optical properties (strong fluorescence, MegaStokes shifting, surface plasmon resonance (SPR))                        | Electrochemical: [284–286]                   |
|                  |                                                                                                                                                              | Electrochemical properties (high sensitivity, rapid response), small size, high surface to volume ratio               | Colorimetric: [287]<br>References: [288–290] |
| Gold             | Detection of pathogens (bacterial zoonosis, viruses, etc.) biological molecules (hormones, etc.), cancer cells, food pathogens (Staphylococcus aureus)       | Optical properties (plasmonic resonance, rapid equipment-free detection, etc.)                                        | Electrochemical: [286,291,292]               |
|                  |                                                                                                                                                              | Simple framework                                                                                                      | Plasmonic Resonance: [293–295]               |
|                  |                                                                                                                                                              | Low-cost                                                                                                              |                                              |
|                  |                                                                                                                                                              | Chemical and physical stability                                                                                       | Colorimetric: [296,297]                      |
|                  |                                                                                                                                                              | Biocompatibility                                                                                                      |                                              |
|                  |                                                                                                                                                              | Conductivity                                                                                                          | Fluorescence: [298,299]                      |
| Platinum         | Detection of medication (heparin, dipyrone), biologically relevant molecules (enzymes, glucose), food pathogens (Staphylococcus aureus)                      | Water solubility                                                                                                      |                                              |
|                  |                                                                                                                                                              | Facile conjugation to biomolecules                                                                                    | References: [300–302]                        |
|                  |                                                                                                                                                              | Sensitive                                                                                                             |                                              |
|                  |                                                                                                                                                              |                                                                                                                       |                                              |
| Silver           | Biologically relevant molecules ( $\alpha$ -fetoprotein (AFP), C-reactive protein (CRP), dopamine, MicroRNA, etc.); Medication (Ethambutol and Pyrazinamide) | Ease of preparation                                                                                                   |                                              |
|                  |                                                                                                                                                              | Catalytic properties (redox reactions, hybridization)                                                                 | Electrochemical: [303–305]                   |
|                  |                                                                                                                                                              | Resistant to corrosion and oxidation                                                                                  |                                              |
|                  |                                                                                                                                                              | High-sensitivity                                                                                                      | Colorimetric: [306–308]                      |
| Silver           | Biologically relevant molecules ( $\alpha$ -fetoprotein (AFP), C-reactive protein (CRP), dopamine, MicroRNA, etc.); Medication (Ethambutol and Pyrazinamide) | Low-detection limits                                                                                                  |                                              |
|                  |                                                                                                                                                              | Optical properties (high plasmon resonance in visible and near infrared regions, high brightness, and photostability) | Plasmonic Resonance: [309–311]               |
|                  |                                                                                                                                                              | Chemical instability and oxidation                                                                                    |                                              |
|                  |                                                                                                                                                              | Ease of preparation of nanoparticles and hybridized composites                                                        | Fluorescence: [312,313]                      |
|                  |                                                                                                                                                              | Easy conversion to silver ions                                                                                        |                                              |
|                  |                                                                                                                                                              | Low cost                                                                                                              | Electrochemical: [314]                       |
| Silver           | Biologically relevant molecules ( $\alpha$ -fetoprotein (AFP), C-reactive protein (CRP), dopamine, MicroRNA, etc.); Medication (Ethambutol and Pyrazinamide) | Abundant                                                                                                              |                                              |
|                  |                                                                                                                                                              |                                                                                                                       |                                              |

|                        |                                                                                                               |                                                                                                                                                                                                                |                                                                                                                                     |
|------------------------|---------------------------------------------------------------------------------------------------------------|----------------------------------------------------------------------------------------------------------------------------------------------------------------------------------------------------------------|-------------------------------------------------------------------------------------------------------------------------------------|
|                        |                                                                                                               | Poor adhesion on dielectric surfaces<br>Electrical conductivity<br>Stability<br>Low sintering temperatures                                                                                                     |                                                                                                                                     |
| Palladium              | Biologically relevant molecules (dopamine)                                                                    | Effective catalytic properties<br>High affinity towards H <sub>2</sub><br>Reversibility                                                                                                                        | Electrochemical: [315,316]<br><br>Optical: [317]<br><br>References: [318,319]                                                       |
| <b>Nanometal Oxide</b> |                                                                                                               |                                                                                                                                                                                                                |                                                                                                                                     |
| Copper Oxide           | Biologically relevant molecules (glucose, HPV16 DNA), Fungi ( <i>Aspergillus niger</i> )                      | Semiconductor metal oxide<br>Ease of preparation<br>Catalytic properties<br>Antimicrobials<br>Cytotoxic to cancer cell lines<br>Cost-effective dye-degraders                                                   | Electrochemical: [320–322]<br><br>Colorimetric: [323]<br><br>References: [324–326]                                                  |
| Iron Oxide(s)          | Food pathogens (Salmonella); Clinically relevant pathogens ( <i>Serratia marcescens</i> ); Enzymes (arginase) | Unique magnetic properties (response to an externally applied magnetic field, Superparamagnetic)<br>Biocompatible and biodegradability<br>Facile to functionalize                                              | Low field nuclear magnetic resonance: [327]<br><br>Electrochemical: [328,329]<br><br>Fluoresces: [330]<br><br>References: [325,331] |
| Titanium Dioxide       | Bacteria (E. coli O157:H7), biological temperature, biologically relevant molecules (HPV16 DNA)               | Biocompatibility<br>High conductivity<br>Low cost                                                                                                                                                              | Electrical: [332]<br><br>Electrochemical: [333]<br><br>Optical: [334]<br><br>References: [325]                                      |
| Zinc oxide             | Biologically relevant molecules (HPV16 DNA); Viruses (SARS-CoV-2)                                             | Wide band gap<br>Binding energy<br>Biocompatibility<br>low-cost<br>Stability<br>Semiconducting material<br>Relatively high refractive index<br>Biocompatibility<br>Electrostatic affinity towards biomolecules | Electrochemical: [292,335,336]<br><br>References: [325,337]                                                                         |

**Table S2.** Studies on the toxicity of 0-D, 1-D, 2-D, and 3-D nanocarbon materials in zebra fish (*Danio rerio*) embryos.

| Material                                                 | Concentration<br>( $\mu\text{g/L}$ )          | Endpoint                                      | Reported outcomes                                                                                                                                                                                                                                      | Ref   |
|----------------------------------------------------------|-----------------------------------------------|-----------------------------------------------|--------------------------------------------------------------------------------------------------------------------------------------------------------------------------------------------------------------------------------------------------------|-------|
| Fullerenes<br>(0-D)                                      | 100 to 500                                    | Cellular<br>Death                             | <ul style="list-style-type: none"> <li>Cell death (concentration dependent) significant at concentrations greater than or equal to 100 <math>\mu\text{g/L}</math></li> <li>100 percent mortality at 200 <math>\mu\text{g/L}</math> exposure</li> </ul> | [338] |
| Multi-walled<br>carbon<br>nanotubes<br>(MWCNTs)<br>(1-D) | 0, 3400, 7600,<br>12500, 25,000<br>and 50,000 | Cellular<br>Death;<br>hatching                | <ul style="list-style-type: none"> <li>Increase in overall cellular apoptosis (concentration-dependent) significant at 50000 <math>\mu\text{g/L}</math></li> <li>Significantly delayed hatching</li> </ul>                                             | [339] |
| Graphene oxide<br>(GO) sheets<br>(2-D)                   | 0, 3400, 7600,<br>12500, 25,000<br>and 50,000 | Cellular<br>Death;<br>hatching                | <ul style="list-style-type: none"> <li>Cellular apoptosis (forehead and eye region)</li> <li>Minor cell growth inhibition</li> <li>Slight hatching delay (50000 <math>\mu\text{g/L}</math>)</li> </ul>                                                 | [339] |
| Laser-induced<br>graphene<br>(3-D)                       | 5000, 10000,<br>50000 and<br>100000           | Growth;<br>hatching;<br>embryo<br>development | <ul style="list-style-type: none"> <li>Biocompatibility</li> <li>No toxic effects</li> <li>No effect on development</li> </ul>                                                                                                                         | [340] |

**Table S3.** Studies on the size-dependent toxicity of nanometal, nanometal oxide, and nanocarbon materials used in biosensing. Studies, where smaller-sized nanomaterials induced higher toxicity, are labeled  $\downarrow$  size =  $\uparrow$  toxicity while studies, where larger-sized materials induce higher toxicity, are labeled  $\uparrow$  size =  $\uparrow$  toxicity.

| Nanomaterial     | Nanoparticle Parameters                                                  | Size            | Model Organism  | End point and results                                          | Reference |
|------------------|--------------------------------------------------------------------------|-----------------|-----------------|----------------------------------------------------------------|-----------|
| <b>Nanometal</b> |                                                                          |                 |                 |                                                                |           |
| Copper           | Shape: Spherical                                                         | 30 nm           | Male Sprague    | Acute (LD50):                                                  | [182]     |
|                  | Zeta Potential: Not Reported                                             | 50 nm           | Dawley rats     | $\downarrow$ size = $\uparrow$ toxicity                        |           |
| Gold             | Surface Functionalization: Not Reported                                  | 80 nm           |                 | Short Term:                                                    | [185]     |
|                  |                                                                          | 1 $\mu\text{m}$ |                 | $\uparrow$ size = $\uparrow$ toxicity                          |           |
| Gold             | Shape: Spherical                                                         | 5 nm            | HepG2 cells and | Cytotoxicity assay:                                            | [185]     |
|                  | Zeta Potential: 5-nm (-10.33 mV), 20-nm (-4.58 mV) and 50-nm (-12.32 mV) | 20 nm           | L02 cells       | $\downarrow$ size = $\uparrow$ toxicity                        |           |
| Gold             |                                                                          | 50 nm           | BALB/c mice     | Hemolysis test: No significant differences                     |           |
|                  |                                                                          |                 |                 | ROS Generation:<br>$\downarrow$ size = $\uparrow$ toxicity     |           |
| Gold             |                                                                          |                 |                 | Cytokines release:<br>$\downarrow$ size = $\uparrow$ toxicity  |           |
|                  |                                                                          |                 |                 | Western blot analysis: $\downarrow$ size = $\uparrow$ toxicity |           |

|                        |                                                                                                                    |                                            |                                                                    |                                                                                                                                                                                                                                                                                                  |       |
|------------------------|--------------------------------------------------------------------------------------------------------------------|--------------------------------------------|--------------------------------------------------------------------|--------------------------------------------------------------------------------------------------------------------------------------------------------------------------------------------------------------------------------------------------------------------------------------------------|-------|
| Platinum               | Shape: Spherical<br>Zeta Potential: 5 nm (–54.20±0.44 to –11.40±0.40 mV) and 70 nm (–39.43±0.62 to –10.04±0.17 mV) | 5 nm<br>70 nm                              | Neonatal mice ventricular cardiomyocytes                           | Cardiomyocyte function: No significant differences<br><br>ROS Generation: No significant differences<br><br>Extracellular lactic dehydrogenase (LDH): No significant differences                                                                                                                 | [37]  |
| Silver                 | Shape: Spherical<br>Zeta Potential: Not reported                                                                   | 10 nm<br>60 nm                             | Human hepatocarcinoma cells (HepG2)                                | Cell Viability Assay:<br>↓ size = ↑ toxicity                                                                                                                                                                                                                                                     | [341] |
| Palladium              | Shape: Spherical<br>Zeta Potential: Not reported                                                                   | 2.0±0.1 nm<br>2.5±0.2 nm<br>and 3.1±0.2 nm | Gram negative <i>E. coli</i><br><br>Gram positive <i>S. aureus</i> | Inhibitory growth effects <i>E. coli</i> :<br>↓ size = ↑ toxicity<br><br>Inhibitory growth effects <i>S. aureus</i> : mid-sized (2.5 nm) particles most toxic and smaller (2.0 nm) and larger (3.1 nm) less toxic                                                                                | [197] |
| <b>Nanometal Oxide</b> |                                                                                                                    |                                            |                                                                    |                                                                                                                                                                                                                                                                                                  |       |
| Copper Oxide           | Shape: Not reported<br>Zeta Potential: Not reported                                                                | 4 nm<br>24 nm                              | A549 human lung cell line                                          | Cell toxicity assay:<br>↑ size = ↑ toxicity                                                                                                                                                                                                                                                      | [342] |
| Iron Oxide(s)          | Shape: Spherical<br>Zeta Potential: –3.99 ± 0.70 mV and –12.43 ± 1.21 mV                                           | 10 nm<br>30 nm                             | Bone marrow cells<br>Female C57BL/6 mice                           | mRNA transcription of inflammation-related genes in macrophages:<br>↑ size = ↑ toxicity                                                                                                                                                                                                          | [343] |
| Titanium Dioxide       | Shape: Square<br>Zeta Potential: Not Reported                                                                      | 100 nm<br>50 nm<br>30 nm<br>10 nm          | Human umbilical vein endothelial cells (HUVECs)                    | Comet assay (DNA damage):<br>↓ size = ↑ toxicity<br><br>Micronucleus test:<br>↓ size = ↑ toxicity<br><br>ROS Generation:<br>↓ size = ↑ toxicity<br><br>Glutathione (GSH) assay: ↑ size = ↑ toxicity (antioxidative ability)<br><br>Western Blot (levels of Nrf2 protein):<br>↓ size = ↑ toxicity | [344] |
| Zinc oxide             | Shape: Spherical<br>Zeta Potential: -10.3 and -10.0 mV                                                             | 50 nm<br>200 nm                            | Human lung adenocarcinoma A549 cell line                           | Cell viability (MTS assay):<br>↓ size = ↑ toxicity                                                                                                                                                                                                                                               | [345] |

Mitochondrial damage and oxidative stress:  
↓ size = ↑ toxicity

Autophagic process:  
↓ size = ↑ toxicity

Autophagic dysfunction:  
↓ size = ↑ toxicity

Lysosomal function:  
↓ size = ↑ toxicity

**Carbon**

|                               |                                                     |                                                                                                     |                                           |                                                                                                                                                                                                                                                                          |
|-------------------------------|-----------------------------------------------------|-----------------------------------------------------------------------------------------------------|-------------------------------------------|--------------------------------------------------------------------------------------------------------------------------------------------------------------------------------------------------------------------------------------------------------------------------|
| Graphene                      | Shape: Not Reported<br>Zeta Potential: Not Reported | S-G (avg 29.31 nm)<br>M-G (307.56 nm)<br>L-G (not reported)                                         | Zebrafish (Danio rerio)<br>HEK 293T cells | Cell viability: Toxicity S-G < L-G < M-G [346]<br><br>DNA damage (HEK 293T): Toxicity M-G < L-G < S-G<br><br>Hatching rate: S-G < M-G < L-G<br><br>Body length: M-G < S-G < L-G<br><br>Body weight: S-G < M-G and L-G<br><br>ROS Generation (Zebrafish): S-G < M-G < L-G |
| Graphene oxide (GO)           | Shape: Not Reported<br>Zeta Potential: GO- L > GO-S | GO-Large (thickness 0.8–1.2 nm, size 500–5000 nm)<br>GO-Small (thickness 0.8–1.2 nm, size < 500 nm) | Macrophages (THP-1 monocytes)             | Cytotoxicity: ↑ size = ↑ toxicity [347]                                                                                                                                                                                                                                  |
| Multi-walled carbon nanotubes | Shape: Nanotube<br>Zeta Potential: Not reported     | Diameter (constant): 40 to 60 nm<br><br>Length (Varied): 3 to 14 μm or 1.5 μm                       | RAW264.7 cells<br>MCF-7 cells             | Cell viability assays: ↑ Length = ↑ toxicity [348]                                                                                                                                                                                                                       |
| Fullerenes (buckyball)        | Shape: Small: smooth and round                      | Hydrodynamic diameter:                                                                              | GFP-Bax stable MCF7 cells                 | Cytotoxicity: ↓ size = ↑ toxicity [349]                                                                                                                                                                                                                                  |

---

|                              |                               |                     |
|------------------------------|-------------------------------|---------------------|
| Larger: amorphous and angula | $108.6 \pm 3.5$ to A549 cells | Bax translocation:  |
| Zeta Potential: Not reported | $228.2 \pm 7.5$               | ↓ size = ↑ toxicity |

---
